# Supplementary material for: Whole-Organism Chemical Screening Identifies Modulators of Pancreatic β-Cell Function
Source: Oxford University Press journal article supplement (doi:10.2337/db17-1223), 2018-08-16
Supplement: db171223supplementarydata2.xlsx [file db171223supplementarydata2.xlsx]

## Sheet: Sheet1
	Supplementary table 1. List of 12 h insulin stimulators
	12 h insulin stimulators with modetate pck1 activity (1<3.5 fold)			screening phenotype (fold change)
	Name	Bioactivity	insulin	Glucose	pck1
1	POLYMYXIN B SULFATE	antibacterial	2.52778	0.352304	2.33689
2	BICUCULLINE(-) METHIODIDE	GABAa antagonist	2.73506	0.770931	2.57961
3	PANCURONIUM BROMIDE	Aminosteroidal neuromuscular blocking agent	2.78943	0.631512	2.51115
4	YC-1	NO (nitric oxide)-independent activator of soluble guanylyl cyclase	2.79479	0.809852	2.19193
5	HARMINE	MAO inhibitor	2.95195	0.679108	3.499
6	2',5'-DIHYDROXY-4-METHOXYCHALCONE	Flavonoid	3.02806	0.494232	2.88704
7	SINENSETIN	Flavonoid, iNOS inhibitor and Cox2 inhibitor, TNF-alpha inhibitor, inibitor of STAT1 inihibitor	3.15873	0.478023	2.29721
8	Quazinone	Phosphodiesterase III (PDE3) inhibitor	3.22071	0.763814	3.18543
9	FLUTAMIDE	antiandrogen	3.32818	0.470058	2.04284
10	DEMETHYLNOBILETIN	citrus flavonoid	3.37706	0.371902	3.08485
11	K 185	Melatonin receptor antagonist	3.60566	0.734306	2.41292
12	SP600125	inhibitor of c-Jun N-terminal kinase (JNK)	4.74167	0.628963	3.2186
13	HEXAMETHYLQUERCETAGETIN	PIM1 kinase antagonist	4.96326	0.649829	2.08977
14	TICLOPIDINE HYDROCHLORIDE	ADP receptor blocker	5.04822	0.785461	2.95403
15	DILOXANIDE FUROATE	amoebicide	5.24033	0.689793	2.62264
16	Kenpaullone	potent inhibitor of CDK1/cyclin B	7.89162	0.677985	2.50316
17	Liranaftate	antifungal	11.6924	0.796133	2.86318
	12 h insulin stimulators with low pck1 activity (<1 fold)			screening phenotype (fold change)
	Name	Bioactivity	insulin	Glucose	pck1
1	IC 261	Casein kinase 1 δ (CK1δ) and CK1 ε inhibitor	4.53168	0.713458	0.9
	12 h insulin stimulators (no pck1 results)			screening phenotype (fold change)
	Name	Bioactivity	insulin	Glucose	pck1
1	(±)-Bay K8644	calcium channel agonist	5.07489	0.707845	-
