# Supplementary material for: Whole-Organism Chemical Screening Identifies Modulators of Pancreatic β-Cell Function
Source: Oxford University Press journal article supplement (doi:10.2337/db17-1223), 2018-08-16
Supplement: db171223supplementarydata3.xlsx [file db171223supplementarydata3.xlsx]

## Sheet: Sheet1
	Supplementary table 2. List of 24 h insulin stimulators
	24 h insulin stimulators with modetate pck1 activity (>3.5 fold)			screening phenotype (fold change)
	Name	Bioactivity	insulin	Glucose	pck1
1	LARIXOL ACETATE		3.77967	0.135291	4.65019
2	ANAGRELIDE HYDROCHLORIDE	Phosphodiesterase 3 (PDE3) inhibitor	2.96	0.70651	5.92102
3	3,7-DIMETHOXYFLAVONE	Flavonoid	2.78502	0.603	5.69197
4	4-METHYLESCULETIN	antioxidant	2.64475	0.520853	4.21821
5	BERGAPTEN	antipsoriatic, antiinflammatory	2.5255	0.522265	7.43933
	24 h insulin stimulators with modetate pck1 activity (1<3.5 fold)			screening phenotype (fold change)
	Name	Bioactivity	insulin	Glucose	pck1
1	CARNOSIC ACID	antioxidantm lipid peroxidation inhibitor, PPAR gamma activator	6.62077	0.736622	2.50178
2	3-METHOXYCATECHOL	converted 3-methylcatechol into acetaldehyde and pyruvate	4.79627	0.7003	1.86922
3	TRIPTOPHENOLIDE	diterpenoid	4.07067	0.5854	3.20107
4	XANTHONE	Aromatic Ketone	3.97595	0.719257	2.93964
5	DICHLORODIPHENYLDICHLOROETHYLENE	insecticide	3.84681	0.7467	1.50854
6	MANGOSTIN TRIMETHYL ETHER		2.89648	0.733201	2.05824
7	TERBINAFINE HYDROCHLORIDE	Inhibits squalene epoxidase, preventing biosynthesis of ergosterol	2.88685	0.672503	2.4386
8	PTERYXIN	muscle relaxant	2.71682	0.714876	2.19242
	24 h insulin stimulators (no pck1 results)			screening phenotype (fold change)
	Name	Bioactivity	insulin	Glucose	pck1
1	ENTANDROPHRAGMIN		3.17617	0.653448	-
