# Supplementary material for: Whole-Organism Chemical Screening Identifies Modulators of Pancreatic β-Cell Function
Source: Oxford University Press journal article supplement (doi:10.2337/db17-1223), 2018-08-16
Supplement: db171223supplementarydata4.xlsx [file db171223supplementarydata4.xlsx]

## Sheet: Sheet1
	Supplementary table 3. List of 48 h insulin stimulators
	48 h insulin stimulators with modetate pck1 activity (>3.5 fold)			screening phenotype (fold change)
	Name	Bioactivity	insulin	Glucose	pck1
1	Mitotane	anti-adrenocorticoid	9.4534	0.351151	4.26177
2	REBAMIPIDE	antiulcer, antioxidant	5.8471	0.75923	4.9569
3	1-Phenyl-3-(2-thiazolyl)-2-thiourea	Dopamine β-hydroxylase inhibitor	4.4589	0.7223	8.05495
4	SPHONDIN	NF-kappaB inhibitor , Cox inhibitor	3.16	0.437195	3.65009
	48 h insulin stimulators with modetate pck1 activity (1<3.5 fold)			screening phenotype (fold change)
	Name	Bioactivity	insulin	Glucose	pck1
1	FARNESOL	anti-bacterial	5.8251	0.7654	2.7356
2	SECURININE	GABAA receptor blocker, CNS stimulant	4.4807	0.7615	1.35971
3	ISOXICAM	Cyclooxigen inhibitor	4.473	0.716169	2.14825
4	Norgestimate	progestogen	4.3009	0.6499	3.4545
5	Mephetyl tetrazole	Kv1.5 potassium channel blocker	4.2652	0.156618	2.1296
6	CURCUMIN	PAIN 'antiedemic, antiinflammatory, bile stimulant; antibacterial, antifungal, lipo/cyclooxygenase inhibitor	4.1685	0.606358	1.60072
7	PRIMULETIN	Flavonoid	4.1515	0.766313	1.15965
8	PERILLYL ALCOHOL	antineoplastic, apoptosis inducer	3.9472	0.6888	1.59566
9	COUMOPHOS	insecticide, cholinesterase inhibitor	3.8926	0.607858	1.58195
10	DCEBIO	activating K+ and Cl− currents	3.732	0.555092	2.11425
11	DICHLORVOS	insecticide, cholinesterase inhibitor	3.7198	0.624052	3.06837
12	5-HYDROXY-2',4',7,8-TETRAMETHOXYFLAVONE	flavonoid	3.7182	0.533001	1.22864
13	PIZOTYLINE MALATE	Serotonin receptor antagonist	3.5886	0.773	2.90684
14	PHENYLBUTAZONE	Cyclooxigen inhibitor	3.4375	0.763	1.30508
15	ARTEMISININ	antimalarial	3.4094	0.741491	2.7675
16	L-745,870 hydrochloride	Selective D4 dopamine receptor antagonist	3.3248	0.7281	2.49945
17	NEROL	monoterpene	3.2933	0.744443	1.40496
18	HUMULENE (alpha)	TNF-α,IL-1β inhibitor	3.2362	0.712972	1.20595
19	Piroxicam	Cyclooxigen inhibitor	3.1606	0.791156	2.8566
20	ATRAZINE	herbicide	3.099	0.7376	1.62155
21	CRYPTOTANSHINONE	Stat3 inhibitor	3.0887	0.6505	1.55798
22	Benperidol	Dopamine antagonist	3.0723	0.742883	1.73199
23	CRESOL	antiinfectant	3.0534	0.724002	1.35153
24	CHLOROTRIANISENE	estrogen	3.0103	0.588075	2.86813
25	DIFLUNISAL	Cyclooxygenase inhibitor	3.0094	0.786911	1.41874
26	LEVOTHYROXINE	Thyroid hormone	3.009	0.3204	2.2778
27	TRIADIMEFON	P450 inhibitor	2.9883	0.695832	1.83077
28	CORYNANTHINE	alkaloid	2.9191	0.797504	1.26773
29	CHLORTHALIDONE	Sodium-chloride symporter inhibitor	2.7675	0.693244	1.77058
30	Imperatorin	a modulator of p38, ERK pathway	2.6204	0.6007	1.33887
31	GUAIAZULENE	antioxidant, inhibits lipid peroxidation inhibitor, antiinflammatory, hepatoprotectant; LD50(rat) 1550 mg/kg po	2.6	0.7607	1.27083
	48 h insulin stimulators with low pck1 activity (<1 fold)			screening phenotype (fold change)
	Name	Bioactivity	insulin	Glucose	pck1
1	Picrotoxin	GABAA receptor antagonist; binds to the GABA receptor-linked Cl− channel	3.9562	0.747466	0.974693
2	PD 169316	p38 MAP kinase inhibitor	3.7926	0.688121	0.626291
3	TRICHLORFON	Acetylcholinesterase inhibitor	2.7295	0.6843	0.920553
