# Supplementary material for: Whole-Organism Chemical Screening Identifies Modulators of Pancreatic β-Cell Function
Source: Oxford University Press journal article supplement (doi:10.2337/db17-1223), 2018-08-16
Supplement: db171223supplementarydata5.xlsx [file db171223supplementarydata5.xlsx]

## Sheet: Sheet1
	Supplementary table 4. List of insulin repressors
	48 h insulin repressors with modetate pck1 activity (1<3.5 fold)			screening phenotype (fold change)
	Name	Bioactivity	insulin	Glucose	pck1
	Name	Bioactivity	insulin	Glucose	pck1
1	Levallorphan tartrate salt	Partial agonist (antagonist) at μ and δ opioid receptors	0.4876	1.3295	1.89179
2	A-68930 hydrochloride	Selective D1 dopamine receptor agonist	0.4654	1.23667	1.2767
	48 h insulin repressors with low pck1 activity (<1 fold)			screening phenotype (fold change)
	Name	Bioactivity	insulin	Glucose	pck1
1	N-(3,3-Diphenylpropyl)glycinamide	NMDA glutamate receptor open channel blocker	0.4855	1.2468	0.961102
2	TPCA-1	IκB kinase-2 inhibitor	0.3523	1.5129	0.771375
3	5-Fluoro-5′-deoxyuridine	thymidylate synthase inhibitor	0.3849	1.266	0.716995
