# Supplementary material for: Whole-Organism Chemical Screening Identifies Modulators of Pancreatic β-Cell Function
Source: Oxford University Press journal article supplement (doi:10.2337/db17-1223), 2018-08-16
Supplement: db171223supplementarydata7.xlsx [file db171223supplementarydata7.xlsx]

## Sheet: Sheet1
Supplementary Table 6. Cq value of qPCR
4.5 dpf
actb	Cq
control	24.77
	24.97
24DB	24.87
	24.9
GNTI	24.92
	24.86
Psora4	24.94
	24.79
SR2640	24.68
	24.92
Karanjin	24.94
	24.76
ins
control	32
	32.2
24DB	31.13
	31.1
GNTI	30.89
	30.79
Psora4	30.15
	29.99
SR2640	30.43
	30.34
Karanjin	30.15
	30.17
neurod1
control	28.12
	28.24
24DB	27.97
	27.95
GNTI	28.11
	28.16
Psora4	28.4
	28.46
SR2640	28.95
	29.24
Karanjin	27.99
	27.91
pax6b
control	30.95
	30.04
24DB	30.69
	31.12
GNTI	31.58
	31.63
Psora4	29.99
	29.73
SR2640	30.44
	30.09
Karanjin	31.27
	31.64
pdx1
control	27.63
	27.19
24DB	30.11
	30.31
GNTI	29.44
	29.41
Psora4	28.3
	28.38
SR2640	27.76
	28.02
Karanjin	29.38
	29.82
mnx1
control	28.92
	28.67
GNTI	29.44
	29.41
24DB	30.57
	30.76
Psora4	29.33
	29.14
SR2640	27.34
	27.39
Karanjin	30.26
	30.01
acta
control	24.15
	23.49
	23.77
24DB	24.06
	23.78
	23.76
GNTI	24.05
	23.77
	23.77
Psora4	24.1
	23.72
	23.77
SR2640	24.23
	23.8
	23.55
Karanjin	24.38
	23.62
	23.6
gcga
control	35.6
	34.27
	34.59
24DB	35.39
	33.97
	34.06
GNTI	39.06
	38.96
	39.1
Psora4	35.37
	35.45
	35.11
SR2640	35.34
	35.29
	34.79
Karanjin	35.74
	34.97
	35.08
6 dpf
actb	Cq
control	22.91
	22.82
24DB	22.95
	23
GNTI	22.98
	22.81
Psora4	23.13
	22.66
SR2640	22.83
	22.92
Karanjin	23.28
	22.61
ins
control	29.6
	29.83
GNTI	29.37
	29.5
24DB	29.28
	29.02
Psora4	29.14
	28.92
SR2640	28.62
	28.52
Karanjin	28.46
	28.49
neurod1
control	32.86
	31.74
24DB	30.35
	30.47
GNTI	30.13
	31.73
Psora4	29.54
	30.3
SR2640	29.11
	29.41
Karanjin	28.75
	29.22
pax6b
control	29.36
	28.85
24DB	28.53
	2.49
GNTI	30.32
	29.03
Psora4	28.7
	28.55
SR2640	28.79
	28.4
Karanjin	28.23
	28.4
pdx1
control	35.16
	34.8
24DB	31.96
	30.95
GNTI	31.21
	34.74
Psora4	30.22
	29.97
SR2640	33.1
	30.81
Karanjin	31.85
	32.36
mnx1
control	33.17
	32.66
24DB	30.83
	31.7
GNTI	31.91
	32.12
Psora4	30.34
	30.95
SR2640	30.66
	29.98
Karanjin	29.81
	30.16
gcga
control	33.06
	33
24DB	32.8
	32.36
GNTI	32.94
	33
Psora4	33.36
	33.04
SR2640	32.25
	32.22
Karanjin	32.79
	32.23
adult
actb	Cq
control	26.72
	26.53
24DB	26.88
	26.35
GNTI	26.6
	26.57
Psora4	26.8
	26.47
SR2640	26.78
	26.61
Karanjin	26.65
	26.77
ins
control	31.4
	31.17
24DB	32.19
	31.75
GNTI	33.45
	33.03
Psora4	26.31
	25.84
SR2640	26.25
	26.1
Karanjin	29.44
	29.43
neurod1
control	36.95
	35.63
24DB	38.79
	36.58
GNTI	38.57
	37.3
Psora4	33.84
	34.07
SR2640	33.97
	33.61
Karanjin	35.63
	35.4
pax6b
control	35
	34.68
24DB	35.26
	35.03
GNTI	36.02
	35.53
Psora4	32.82
	32.25
SR2640	32.6
	32.32
Karanjin	34.14
	33.89
pdx1
control	37.38
	37.59
24DB	36.97
	36.94
GNTI	37.23
	37.79
Psora4	35.48
	35.16
SR2640	35.3
	35.11
Karanjin	35.77
	36.17
mnx1
control	35.73
	37.04
24DB	36.12
	36.99
GNTI	36.99
	37.56
Psora4	32.8
	32.14
SR2640	33.16
	33.19
Karanjin	34.3
	33.53
gcga
control	35.6
	35.18
24DB	34.9
	34.41
GNTI	36.69
	35.74
Psora4	30.72
	30.43
SR2640	31.81
	31.83
Karanjin	34.91
	34.6
mouse islets
Hprt1	Cq
DMSO	25.3442
	25.4961
	25.2405
	25.3112
	25.4441
	25.9136
	25.2617
Psora4	25.1508
	25.3402
	25.6759
	25.0233
	25.0973
	25.6564
Pap-1	25.8812
	25.1293
	25.2753
	25.5155
	25.4089
	25.3915
Ins1
DMSO	15.9575
	16.3247
	16.1069
	16.2236
	16.6839
	17.1325
	17.0565
Psora4	15.9507
	16.0399
	16.6417
	16.28
	16.4134
	16.6106
Pap-1	16.5304
	15.9178
	16.2285
	16.0676
	16.3312
	16.909
Ins2
DMSO	13.577
	13.6483
	13.5291
	13.3455
	13.6498
	14.3211
	14.0815
Psora4	13.4061
	13.3948
	14.0077
	13.2173
	13.4521
	13.6484
Pap-1	13.4309
	13.0656
	13.2689
	13.279
	13.3311
	13.9002
